# Supplementary material for: DiR-labeled Embryonic Stem Cells for Targeted Imaging of in vivo Gastric Cancer Cells
Source: PubMed Central journal article supplement — Theranostics. 2012 Jun 15;2(6):618–28. doi: 10.7150/thno.4561 (PMC3388594; doi:10.7150/thno.4561), 2012-06-15
Supplement: thnov02p0618s1.pdf [file thnov02p0618s1.pdf]

## Supplementary Material

Jing Ruan, et al.

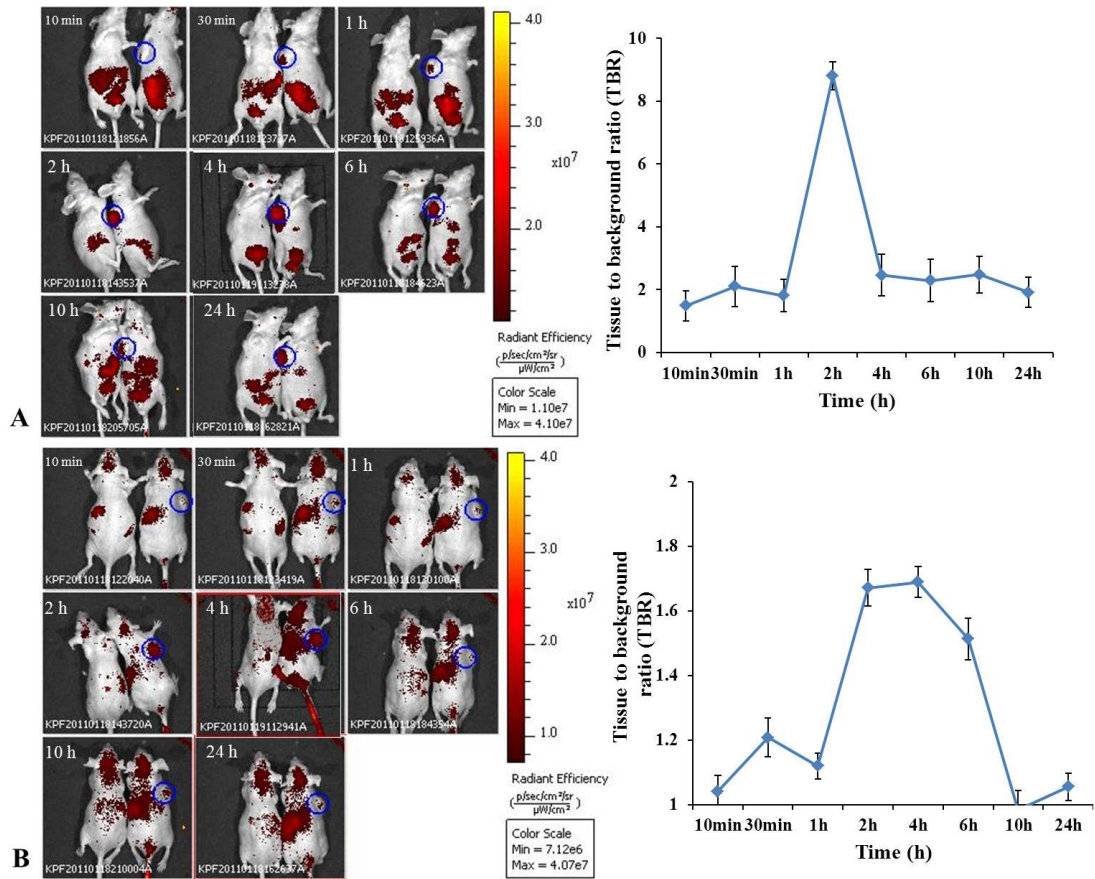

Fig.S1 *In vivo* fluorescence images of mice loaded with gastric tumors at 10 min, 30 min, 1 h, 2 h, 4 h, 6 h, 10 h, 24 h post-injection DiR-mES cells at supine (A) and prone (B) positions.

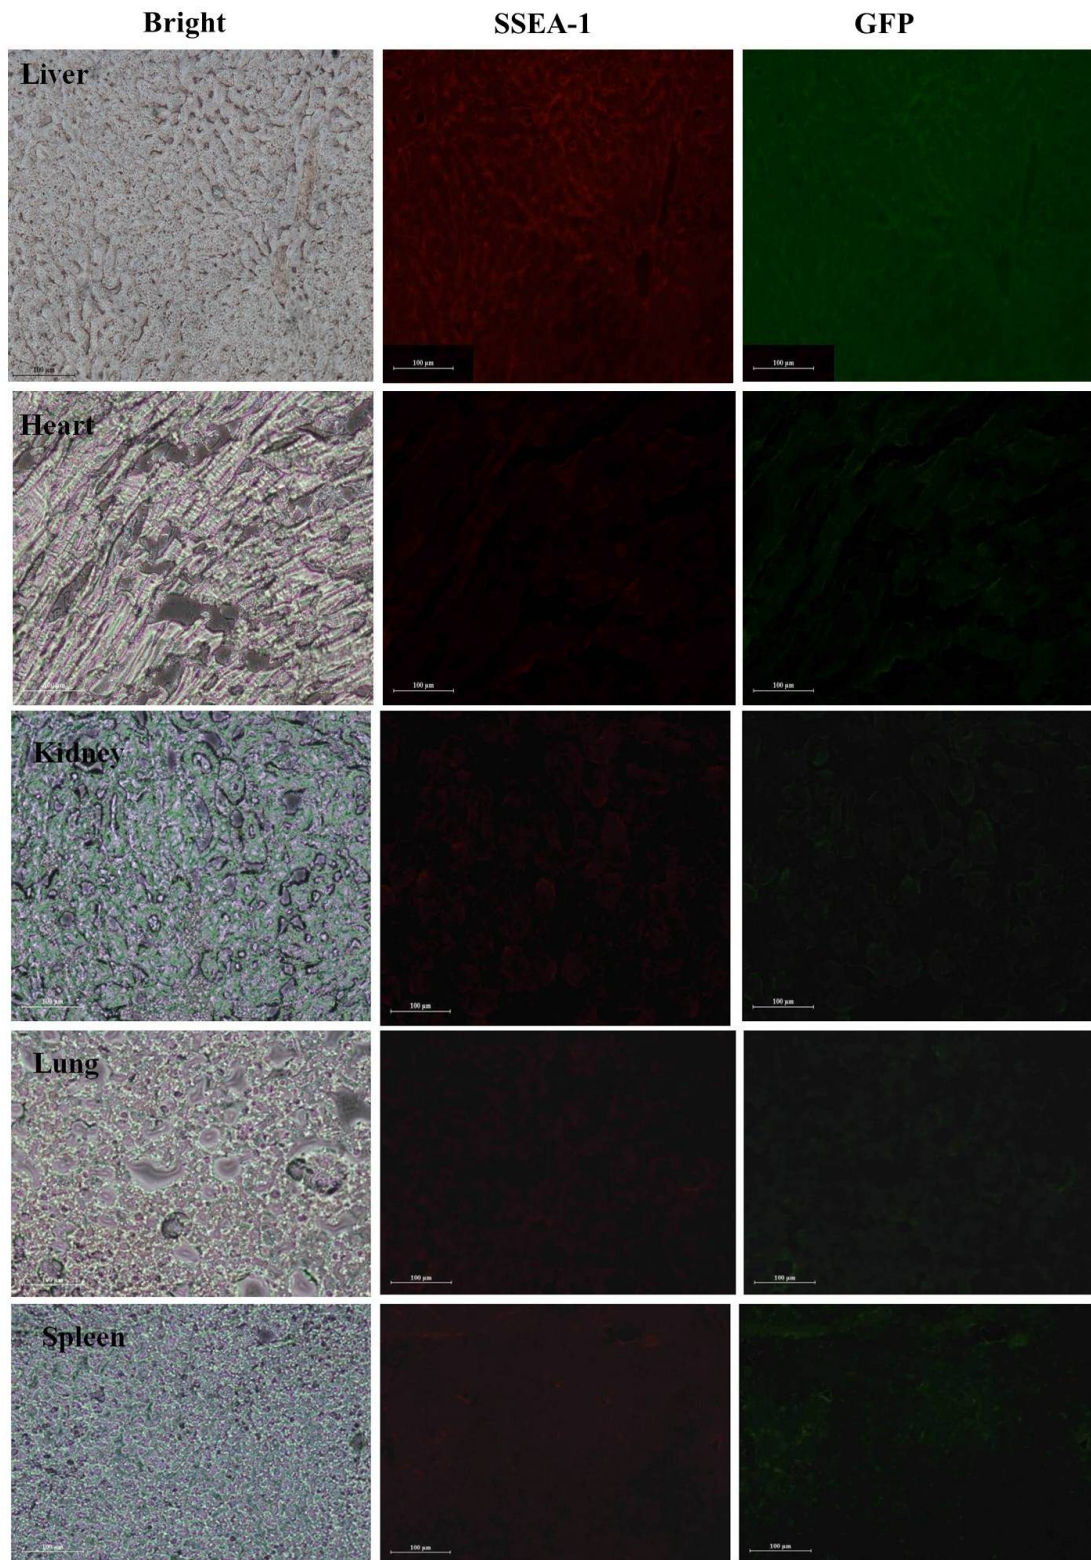

Fig.S2 Immunofluorescence analysis of organs in the mice of test group. SSEA-1 and GFP were not expressed in Liver, Heart, Kidney, Lung and Spleen tissues.
